# Supplementary material for: Combination of Local Ablative Techniques with Radiotherapy for Primary and Recurrent Lung Cancer: A Systematic Review
Source: MDPI journal article supplement (doi:10.3390/cancers15245869), 2023-12-16
Supplement: s1 [file s1]

| Study         | Was hypothesis stated? |         |    | Was the study prospective? |         |    | Is multicentric? |         |    | Consecutive patients |         |    | Descriibed characteristics of patients |         |    | Clearly stated eligibility criteria |         |    | Described intervention |         |    | Reported losses to follow-up and adverse events |         |    | Conclusions of the study supported by the results |         |    | Final Score |
|---------------|------------------------|---------|----|----------------------------|---------|----|------------------|---------|----|----------------------|---------|----|----------------------------------------|---------|----|-------------------------------------|---------|----|------------------------|---------|----|-------------------------------------------------|---------|----|---------------------------------------------------|---------|----|-------------|
|               | Yes                    | Partial | No | Yes                        | Unclear | No | Yes              | Unclear | No | Yes                  | Unclear | No | Yes                                    | Partial | No | Yes                                 | Partial | No | Yes                    | Partial | No | Yes                                             | Unclear | No | Yes                                               | Unclear | No |             |
| Steber (2021) | 2                      | –       | –  | 2                          | –       | –  | –                | –       | 0  | 2                    | –       | –  | 2                                      | –       | –  | –                                   | 1       | –  | 2                      | –       | –  | 2                                               | –       | –  | 2                                                 | –       | –  | 15          |
| Grieco (2006) | 2                      | –       | –  | –                          | –       | 0  | –                | –       | 0  | 2                    | –       | –  | 2                                      | –       | –  | –                                   | 1       | –  | 2                      | –       | –  | 2                                               | –       | –  | 2                                                 | –       | –  | 13          |
| Dupuy (2006)  | 2                      | –       | –  | –                          | –       | 0  | –                | –       | 0  | 2                    | –       | –  | 2                                      | –       | –  | –                                   | 1       | –  | 2                      | –       | –  | 2                                               | –       | –  | 2                                                 | –       | –  | 13          |
| Cheng (2016)  | 2                      | –       | –  | –                          | –       | 0  | –                | –       | 0  | 2                    | –       | –  | 2                                      | –       | –  | –                                   | 1       | –  | 2                      | –       | –  | 2                                               | –       | –  | 2                                                 | –       | –  | 13          |
| Leung (2010)  | 2                      | –       | –  | –                          | –       | 0  | –                | –       | 0  | 2                    | –       | –  | 2                                      | –       | –  | –                                   | 1       | –  | 2                      | –       | –  | 2                                               | –       | –  | 2                                                 | –       | –  | 13          |
| Brooks (2018) | 2                      | –       | –  | –                          | –       | 0  | –                | –       | 0  | 2                    | –       | –  | –                                      | 1       | –  | –                                   | 1       | –  | 2                      | –       | –  | –                                               | 1       | –  | –                                                 | 1       | –  | 10          |
